# Supplementary material for: Supramolecular networks assembled from binuclear complexes with pyridazine-3,6-dicarboxylate
Source: Royal Society of Chemistry journal article supplement (doi:10.1039/b805832f), 2008-01-01
Supplement: b805832f.pdf [file b805832f.pdf]

## Supramolecular Networks Assembled from Binuclear Complexes with Pyridazine-3,6-dicarboxylate

Wei-Wei Sun, Qi Yue, Ai-Ling Cheng, and En-Qing Gao

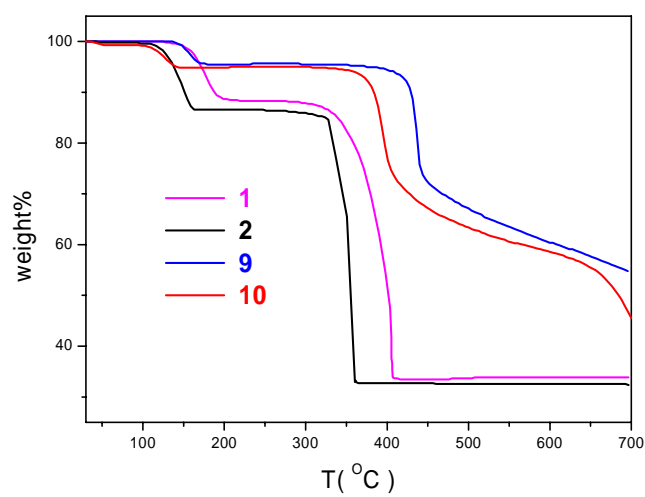

Figure S1. The TGA curves of compounds 1, 2, 9 and 10.
